# Supplementary material for: Quality improvement in a crisis: a qualitative study of experiences and lessons learned from the Irish National Ambulance Service response to the COVID-19 pandemic
Source: HighWire-hosted journal article supplement (doi:10.1136/bmjopen-2021-057162), 2022-01-01
Supplement: bmjopen-2021-057162supp001_data_supplement.pdf [file bmjopen-2021-057162supp001_data_supplement.pdf]

### Supplementary File 1 – Semi-structured Interview Schedule

| Main question                                                                                                 | Possible follow-up questions                                                                                                                                                                                                                                                                                                                                                                                                                                                                                                                                                    |
|---------------------------------------------------------------------------------------------------------------|---------------------------------------------------------------------------------------------------------------------------------------------------------------------------------------------------------------------------------------------------------------------------------------------------------------------------------------------------------------------------------------------------------------------------------------------------------------------------------------------------------------------------------------------------------------------------------|
| Can you tell me about your role in the NAS COVID-19 Response Room?                                            | <ul style="list-style-type: none"> <li>• What was your previous role?</li> <li>• Was working in the response room different?</li> <li>• What were your main tasks/responsibilities?</li> <li>• When did you join the response room?</li> <li>• When did you leave the response room?</li> </ul>                                                                                                                                                                                                                                                                                 |
| In your experience of working in the response room, what worked well?                                         | <ul style="list-style-type: none"> <li>• Were there any particular practices or innovations that worked well?</li> <li>• Were there practices you would like to maintain in the future?</li> <li>• What worked well in terms of:               <ul style="list-style-type: none"> <li>○ Leadership</li> <li>○ Staff engagement</li> <li>○ Person/family engagement</li> <li>○ Quality improvement methods</li> <li>○ Measurement for quality</li> <li>○ Governance</li> </ul> </li> </ul>                                                                                       |
| In your experience of working in the response room, what did not work well?                                   | <ul style="list-style-type: none"> <li>• Were there any particular practices or innovations that did not work well?</li> <li>• Were there practices you would like to stop/cease in the future?</li> <li>• Were there any practices or areas that required improvement?</li> <li>• What did not work well in terms of:               <ul style="list-style-type: none"> <li>○ Leadership</li> <li>○ Staff engagement</li> <li>○ Person/family engagement</li> <li>○ Quality improvement methods</li> <li>○ Measurement for quality</li> <li>○ Governance</li> </ul> </li> </ul> |
| Are there any other important areas or practices that we haven't discussed?                                   | <ul style="list-style-type: none"> <li>• Is there anything else that worked well or that didn't work well?</li> <li>• Is there anything else you would like to add?</li> </ul>                                                                                                                                                                                                                                                                                                                                                                                                  |
| What is your opinion of interviewing staff to find out what worked well and what didn't in the response room? | <ul style="list-style-type: none"> <li>• What are the pros and cons of this approach?</li> <li>• Is there another approach that would be better?</li> </ul>                                                                                                                                                                                                                                                                                                                                                                                                                     |
