# Supplementary material for: Quality improvement in a crisis: a qualitative study of experiences and lessons learned from the Irish National Ambulance Service response to the COVID-19 pandemic
Source: HighWire-hosted journal article supplement (doi:10.1136/bmjopen-2021-057162), 2022-01-01
Supplement: bmjopen-2021-057162supp002_data_supplement.pdf [file bmjopen-2021-057162supp002_data_supplement.pdf]

## Supplementary File 2 – Standards for Reporting Qualitative Research Checklist

| Index | Topic                                                                                         | Section(s)                                         |
|-------|-----------------------------------------------------------------------------------------------|----------------------------------------------------|
|       | <b>Title and Abstract</b>                                                                     |                                                    |
| 1     | Title                                                                                         | Title Page                                         |
| 2     | Abstract                                                                                      | Abstract                                           |
|       | <b>Introduction</b>                                                                           |                                                    |
| 3     | Problem formulation                                                                           | Introduction                                       |
| 4     | Purpose or research question                                                                  | Introduction                                       |
|       | <b>Methods</b>                                                                                |                                                    |
| 5     | Qualitative approach and research paradigm                                                    | Design                                             |
| 6     | Researcher characteristics and reflexivity                                                    | Title Page, Procedure                              |
| 7     | Context                                                                                       | Title Page, Introduction, Design, Procedure        |
| 8     | Sampling strategy                                                                             | Participants                                       |
| 9     | Ethical issues pertaining to human subjects                                                   | Procedure, Ethical Approval                        |
| 10    | Data collection methods                                                                       | Design, Procedure                                  |
| 11    | Data collection instruments and technologies                                                  | Procedure, Supplemental File 1                     |
| 12    | Units of study                                                                                | Participants, Procedure, Table 1                   |
| 13    | Data processing                                                                               | Procedure, Data Analysis                           |
| 14    | Data analysis                                                                                 | Data Analysis                                      |
| 15    | Techniques to enhance trustworthiness                                                         | Design, Procedure, Data Analysis                   |
|       | <b>Results</b>                                                                                |                                                    |
| 16    | Synthesis and interpretation                                                                  | Results, Table 2                                   |
| 17    | Links to empirical data                                                                       | Results                                            |
|       | <b>Discussion</b>                                                                             |                                                    |
| 18    | Integration with prior work, implications, transferability, and contribution(s) to the field. | Discussion                                         |
| 19    | Limitations                                                                                   | Strengths and Limitations of the Study, Discussion |
|       | <b>Other</b>                                                                                  |                                                    |
| 20    | Conflicts of interest                                                                         | Competing Interests                                |
| 21    | Funding                                                                                       | Funding                                            |

**Reference:** O'Brien BC, Harris IB, Beckman TJ, et al. Standards for reporting qualitative research: a synthesis of recommendations. *Acad Med.* 2014;89:1245–51.
